# Supplementary material for: Nickel(ii) complexes chelated by 2,6-pyridinedicarboxamide: syntheses, characterization, and ethylene oligomerization
Source: Royal Society of Chemistry journal article supplement (doi:10.1039/c6nj00559d), 2016-01-01
Supplement: c6nj00559d1.pdf [file c6nj00559d1.pdf]

**Submission to *New Journal of Chemistry***

**Nickel(II) Complexes Chelated by 2,6-Pyridinedicarboxamide:  
Syntheses, Characterization, and Ethylene Oligomerization**

Jie Zhang,<sup>a</sup> Shaofeng Liu,<sup>b,\*</sup> Antai Li,<sup>a</sup> Hongqi Ye,<sup>a,\*</sup> Zhibo Li<sup>b</sup>

<sup>a</sup>*Department of Chemistry and Engineering, Central South University, Changsha 410083, P. R. China. E-mail: yeslab@csu.edu.cn*

<sup>b</sup>*School of Polymer Science and Engineering, Qingdao University of Science and Technology, Qingdao 266042, P. R. China. E-mail: shaofengliu@qust.edu.cn*

**Table S1.** Crystal data and structure refinement for **Ni5** and **Ni6**.

| Complex                                     | <b>Ni5</b> ·CH <sub>3</sub> OH·2H <sub>2</sub> O                                                                         | <b>Ni6</b> ·3C <sub>2</sub> H <sub>5</sub> OH                                                           |
|---------------------------------------------|--------------------------------------------------------------------------------------------------------------------------|---------------------------------------------------------------------------------------------------------|
| Empirical formula                           | C <sub>27</sub> H <sub>31</sub> Br <sub>2</sub> N <sub>3</sub> NiO <sub>2</sub><br>·CH <sub>3</sub> OH·2H <sub>2</sub> O | C <sub>31</sub> H <sub>39</sub> Br <sub>2</sub> N <sub>3</sub> NiO <sub>2</sub><br>·3CH <sub>3</sub> OH |
| Formula weight                              | 714.13                                                                                                                   | 842.38                                                                                                  |
| Temperature / K                             | 173.15                                                                                                                   | 173.15                                                                                                  |
| Crystal system                              | Monoclinic                                                                                                               | Orthorhombic                                                                                            |
| Space group                                 | P2 <sub>1</sub> /c                                                                                                       | P2 <sub>1</sub> 2 <sub>1</sub> 2 <sub>1</sub>                                                           |
| a / Å, b / Å, c / Å                         | 15.331(3),<br>15.527(3),<br>14.982(3)                                                                                    | 14.859(3),<br>16.766(4),<br>16.883(4)                                                                   |
| α/°, β/°, γ/°                               | 90, 118.32 (3), 90                                                                                                       | 90, 90, 90                                                                                              |
| Volume / Å <sup>3</sup>                     | 3139.5(13)                                                                                                               | 4205.9(16)                                                                                              |
| Z                                           | 4                                                                                                                        | 4                                                                                                       |
| ρ <sub>calc</sub> / mg mm <sup>-3</sup>     | 1.511                                                                                                                    | 1.330                                                                                                   |
| μ / mm <sup>-1</sup>                        | 3.203                                                                                                                    | 2.402                                                                                                   |
| F(000)                                      | 1456.0                                                                                                                   | 1752.0                                                                                                  |
| Crystal size / mm <sup>3</sup>              | 0.190 × 0.180 × 0.110                                                                                                    | 0.370 × 0.230 × 0.190                                                                                   |
| 2θ range for data collection                | 3.018 to 54.978°                                                                                                         | 5.402 to 55°                                                                                            |
| Index ranges                                | -17 ≤ h ≤ 19,<br>-20 ≤ k ≤ 19,<br>-19 ≤ l ≤ 19                                                                           | -19 ≤ h ≤ 18,<br>-12 ≤ k ≤ 21,<br>-21 ≤ l ≤ 16                                                          |
| Reflections collected                       | 22233                                                                                                                    | 16609                                                                                                   |
| Independent reflections                     | 7137 [R(int) = 0.0515]                                                                                                   | 9342 [R(int) = 0.0372]                                                                                  |
| Data/restraints/parameters                  | 7137/28/382                                                                                                              | 9342/12/470                                                                                             |
| Goodness-of-fit on F <sup>2</sup>           | 1.235                                                                                                                    | 1.118                                                                                                   |
| Final R indexes [I>2σ (I)]                  | R <sub>1</sub> = 0.0806,<br>wR <sub>2</sub> = 0.1632                                                                     | R <sub>1</sub> = 0.0483,<br>wR <sub>2</sub> = 0.0909                                                    |
| Final R indexes [all data]                  | R <sub>1</sub> = 0.0909,<br>wR <sub>2</sub> = 0.1684                                                                     | R <sub>1</sub> = 0.0551,<br>wR <sub>2</sub> = 0.0945                                                    |
| Largest diff. peak/hole / e Å <sup>-3</sup> | 0.97/-0.67                                                                                                               | 0.39/-0.49                                                                                              |

$$R_1 = \frac{\sum |F_o| - |F_c|}{\sum |F_o|}; wR_2 = \left[ \frac{\sum [w(F_o^2 - F_c^2)^2]}{\sum [w(F_o^2)^2]} \right].$$

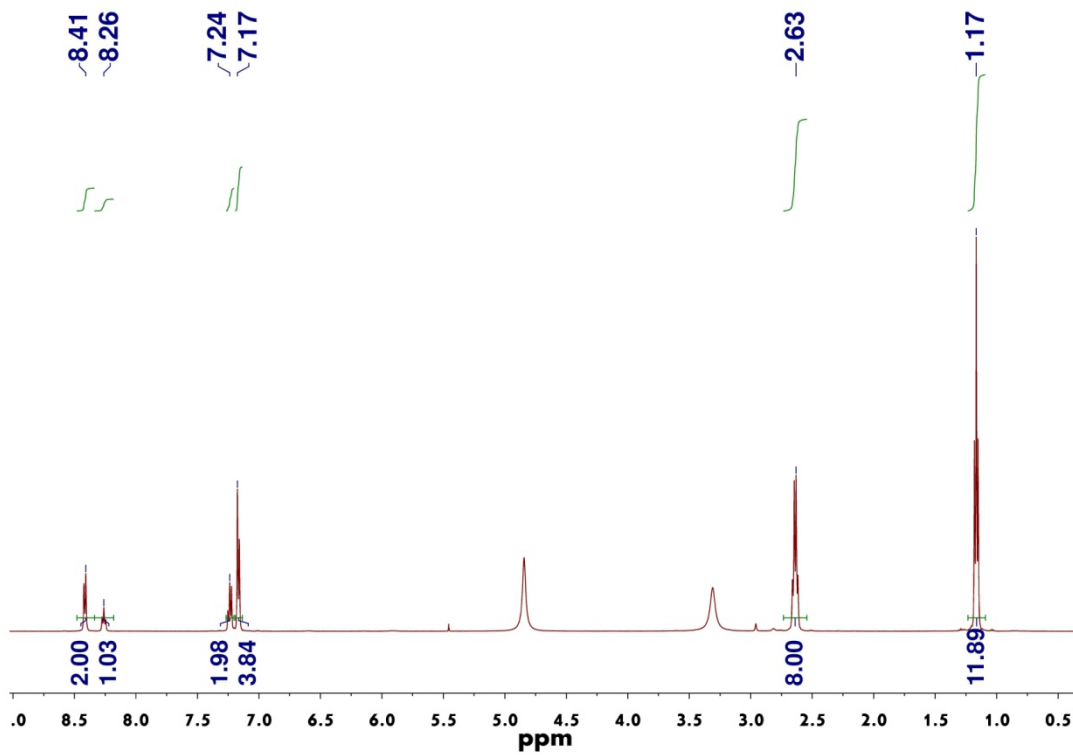

**Figure S1.**  $^1\text{H}$  NMR of Ni5 in  $\text{CD}_3\text{OD}$ .

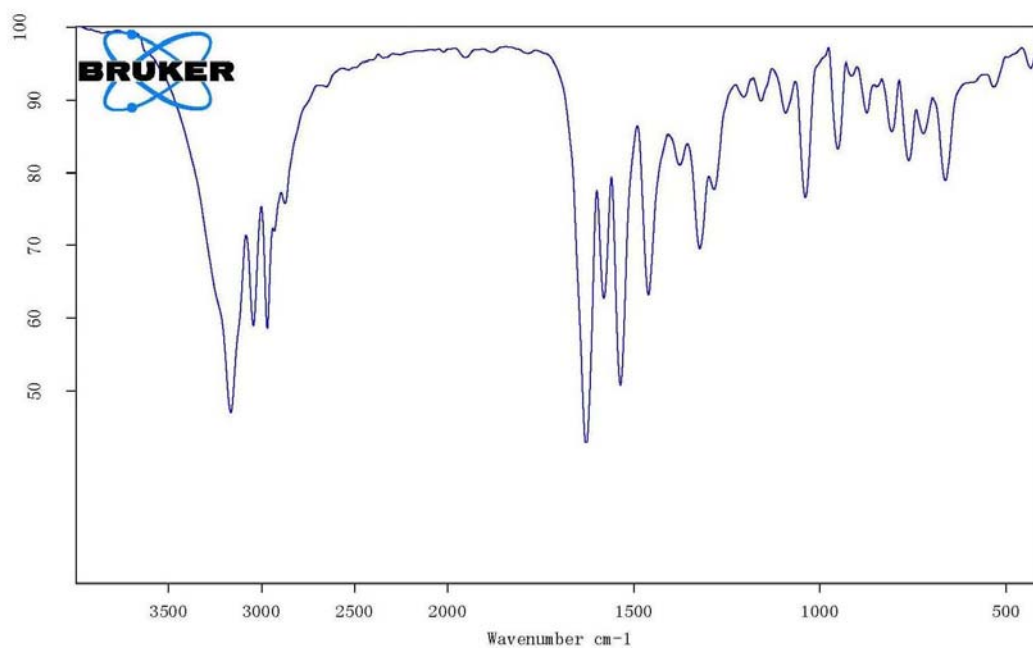

**Figure S2.** FT-IR of Ni5 yellowish powder.

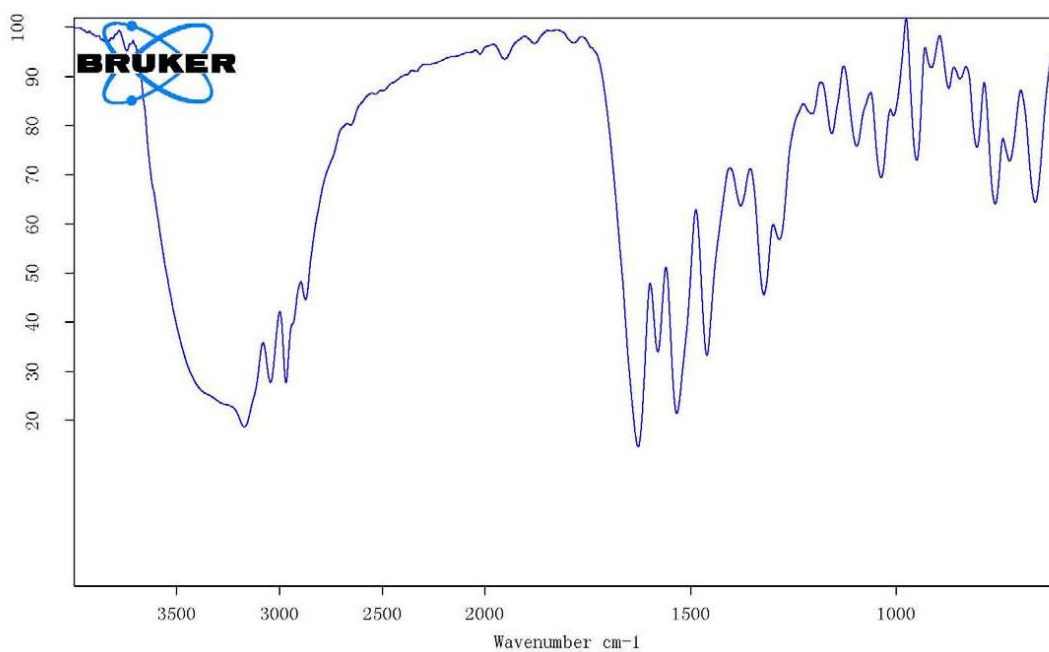

**Figure S3.** FT-IR of Ni5·CH<sub>3</sub>OH·2H<sub>2</sub>O green crystal.
